# Supplementary material
Source: Springer Nature journal article supplement (https://www.springermedizin.de/resource/supplementary/12906_2012_1287_MOESM3_ESM.pdf/9522172)

# DU145 treated with 1mg/ml of Marine Baterial Extract for 24 Hr

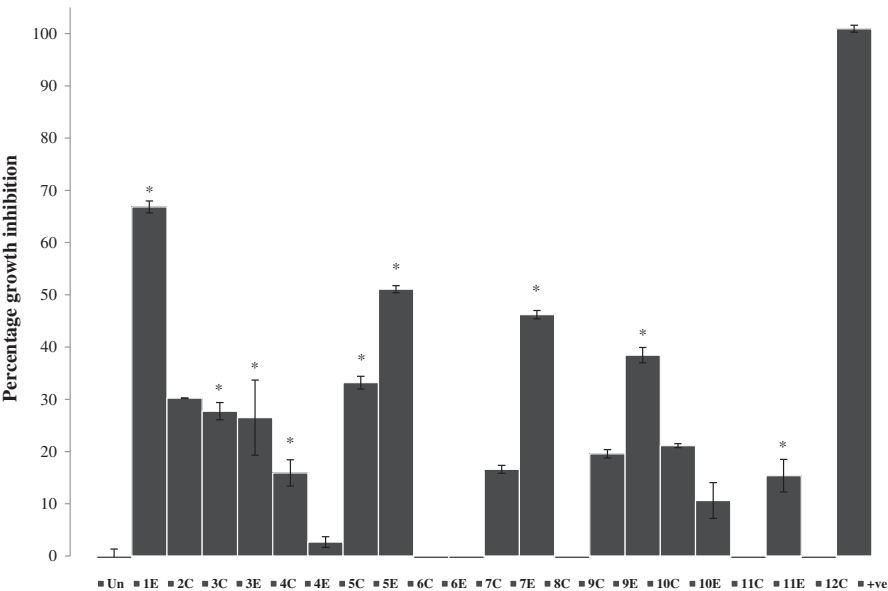

Supplement: MOESM3 [file 9522172]
